# Supplementary material for: Two-photon luminescence from polar bis-terpyridyl-stilbene derivatives of Ir(iii) and Ru(ii)
Source: Royal Society of Chemistry journal article supplement (doi:10.1039/c0dt00750a), 2010-01-01

## Two-photon luminescence from polar bis-terpyridyl-stilbene derivatives of Ir(III) and Ru(II)

Louise S. Natrajan,<sup>\*a</sup> Anita Toulmin,<sup>a</sup> Alex Chew<sup>a</sup> and Steven W. Magennis<sup>\*a,b</sup>

### SUPPLEMENTARY INFORMATION

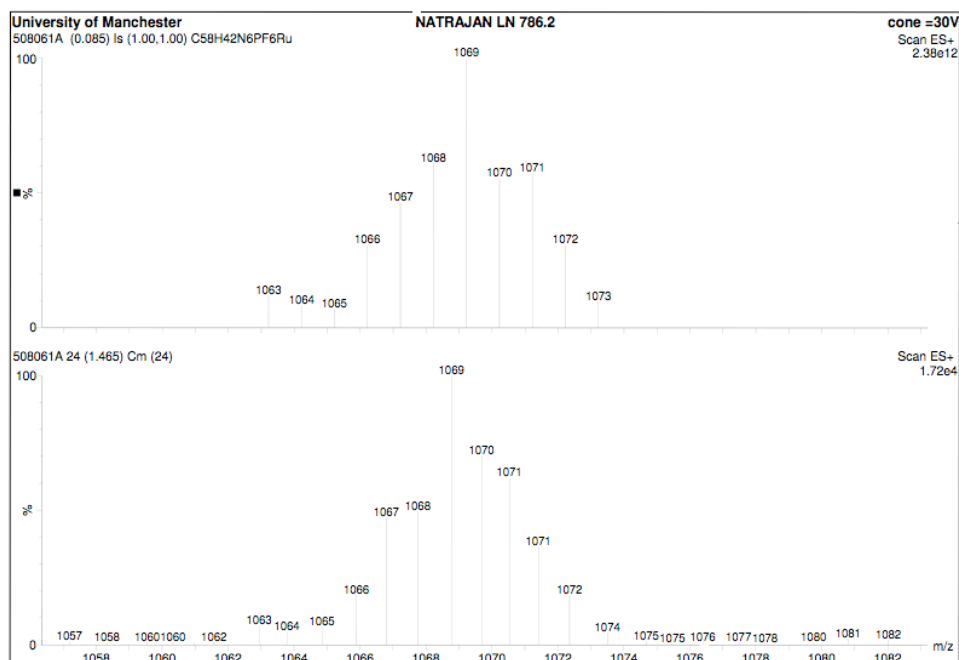

**Fig. S1.** Electrospray mass spectrum (positive mode) of  $[\text{Ru}(\text{tpystilbene})_2] \cdot 2\text{PF}_6$ ; molecular ion corresponds to  $\{\text{M} - \text{PF}_6\}^+$ . Top, calculated spectrum; bottom, experimentally observed spectrum.

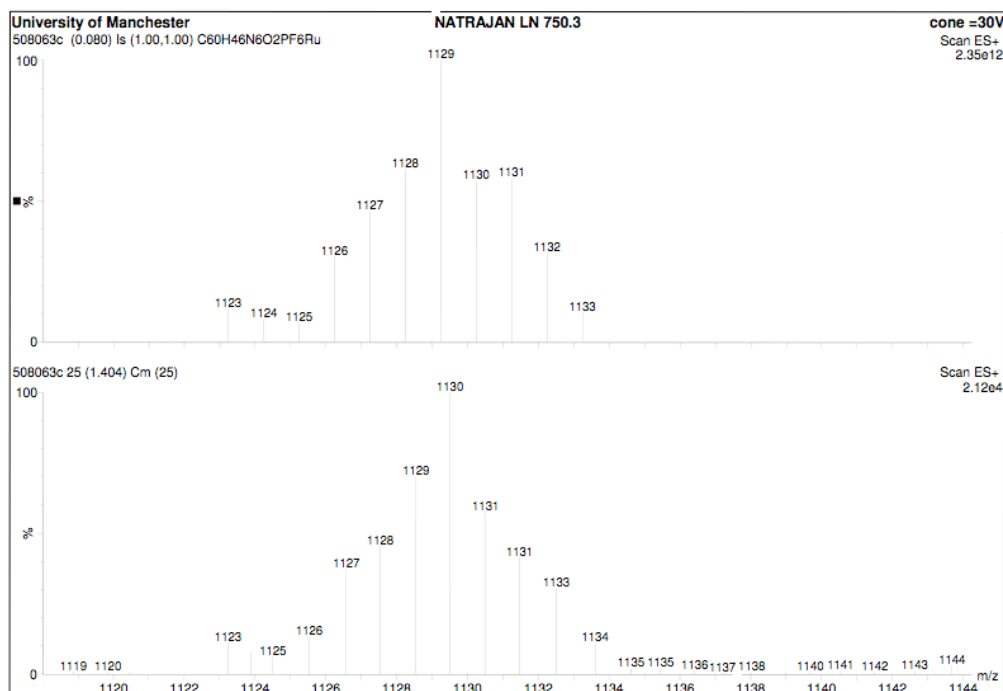

**Fig. S2.** Electrospray mass spectrum (positive mode) of  $[\text{Ru}(\text{tpyeneaniso})_2] \cdot 2\text{PF}_6$ ; molecular ion corresponds to  $\{\text{M} - \text{PF}_6\}^+$ . Top, calculated spectrum; bottom, experimentally observed spectrum.

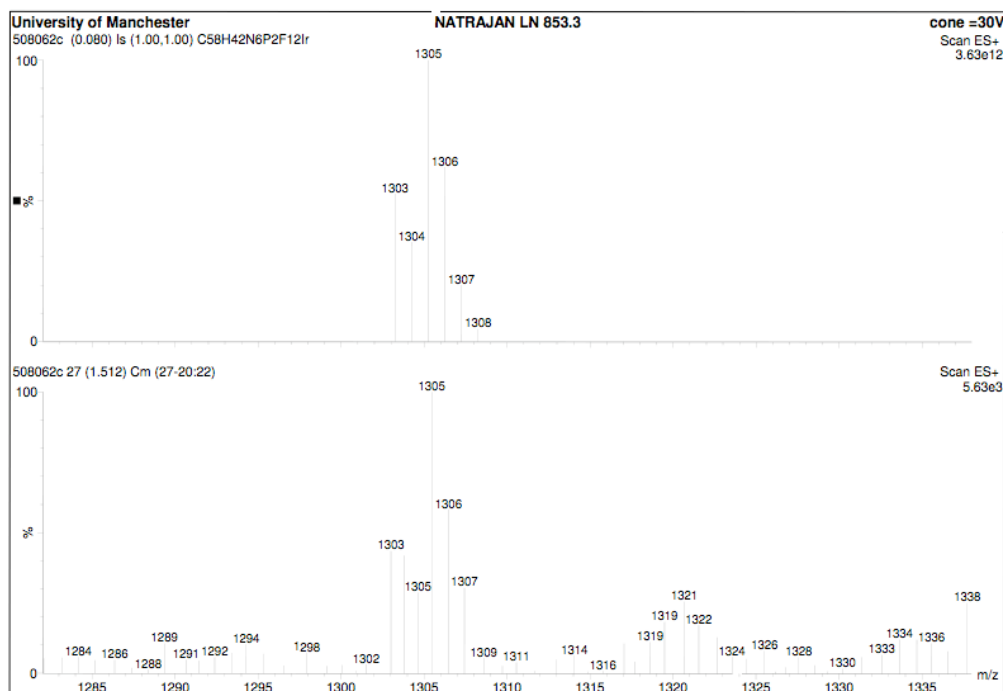

**Fig. S3.** Electrospray mass spectrum (positive mode) of  $[\text{Ir}(\text{tpystilbene})_2] \cdot 3\text{PF}_6$ ; molecular ion corresponds to  $\{\text{M} - \text{PF}_6\}^+$ . Top, calculated spectrum; bottom, experimentally observed spectrum.

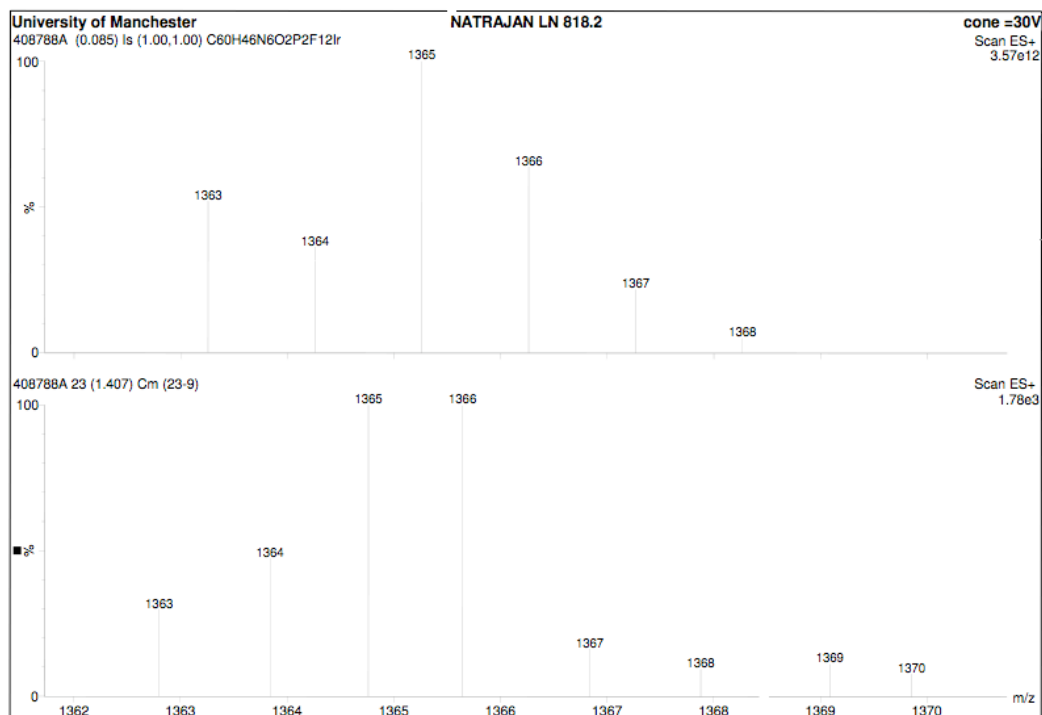

**Fig. S4.** Electrospray mass spectrum (positive mode) of [Ir(tpyeneanisole)<sub>2</sub>].3PF<sub>6</sub>; molecular ion corresponds to {M – PF<sub>6</sub>}<sup>+</sup>. Top, calculated spectrum; bottom, experimentally observed spectrum.

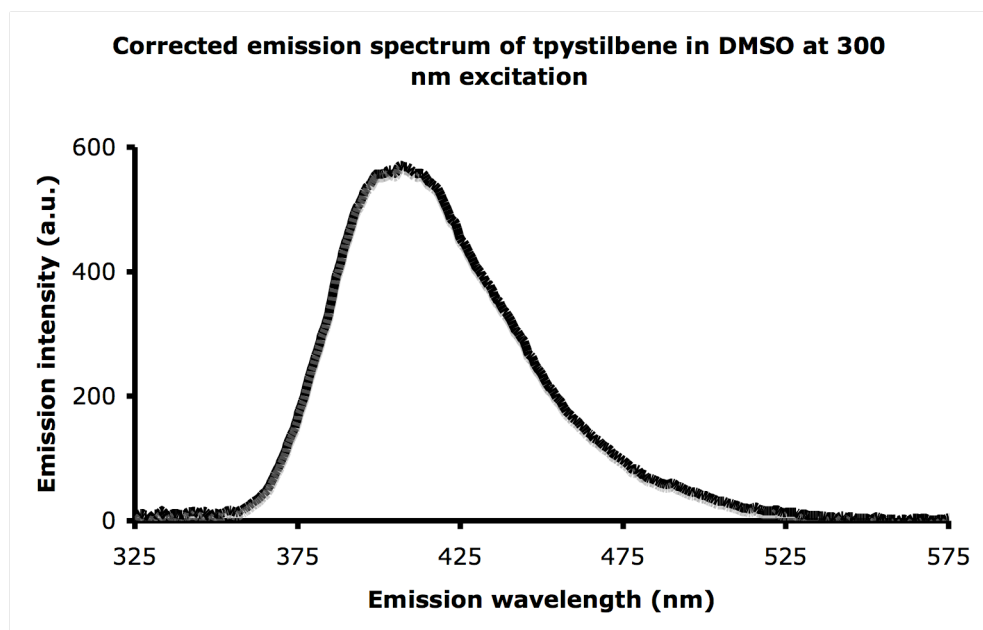

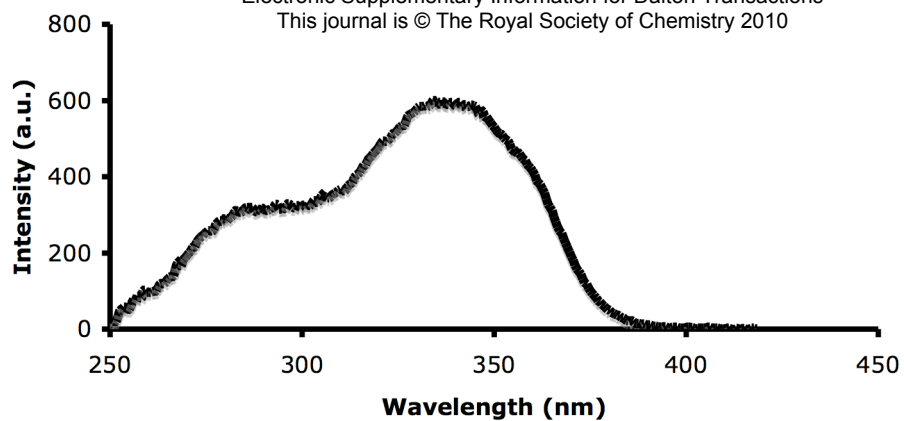

**Corrected emission spectrum of ttpyeneanisole in DMSO at 375 nm excitation**

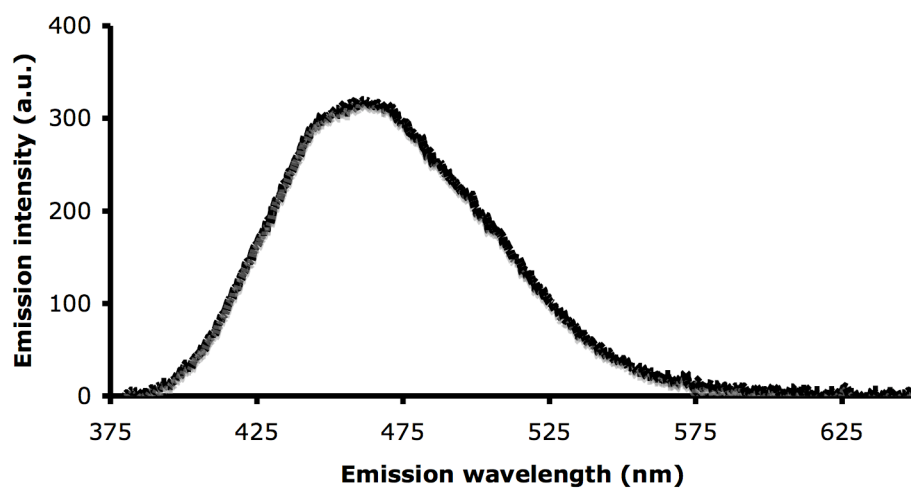

**Corrected excitation spectrum of ttpyeneanisole in DMSO monitored at 460 nm**

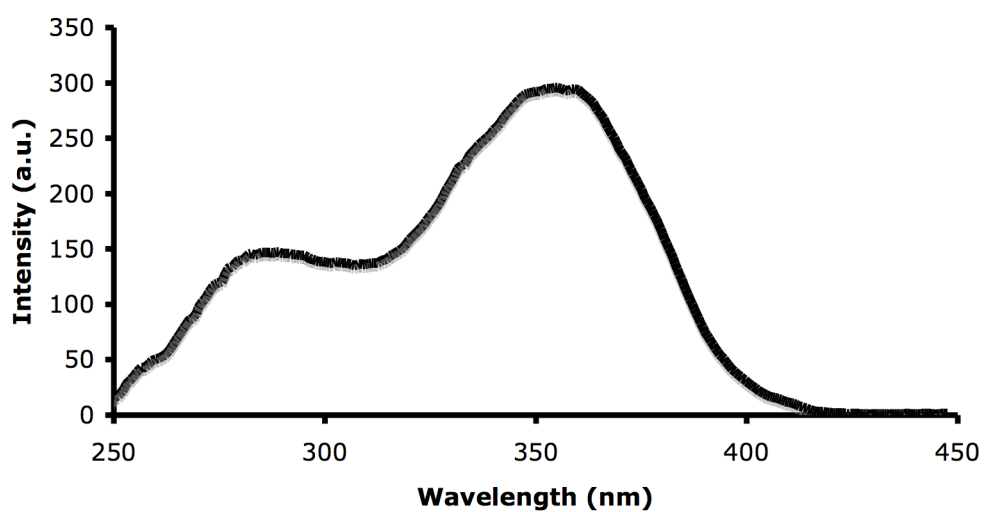

Supplement: c0dt00750a.pdf [file c0dt00750a.pdf]
